# Supplementary material
Source: MDPI journal article supplement (https://www.mdpi.com/2073-4352/13/4/583)
Supplement: s1 [file s1]

## Supplementary information

### Neuro-evolutive modeling of transition temperatures for five-ring bent-core molecules derived from resorcinol

Elena Niculina Drăgoi<sup>1</sup>, Irina Cârlescu<sup>1</sup>, Răzvan Puf<sup>2</sup>, Tudor Vasiliu<sup>2</sup>, Elena-Luiza Epure<sup>1\*</sup>

1- “Cristofor Simionescu” Faculty of Chemical Engineering and Environmental Protection, Gheorghe Asachi Technical University, 73 Prof. Dr. Doc. D. Mangeron Street, 700050 Iasi, Romania

2- Centre of Advanced Research in Bionanoconjugates and Biopolymers, Romanian Academy Petru Poni (PP) Institute of Macromolecular Chemistry, 00487, Iasi, Romania

\* Correspondence: lepure@tuiasi.ro.

Table S1. The molecular formula of the bent-core compounds included in the database

| Molecular structure                                                                  | Code of structure | n  | Reference |
|--------------------------------------------------------------------------------------|-------------------|----|-----------|
| 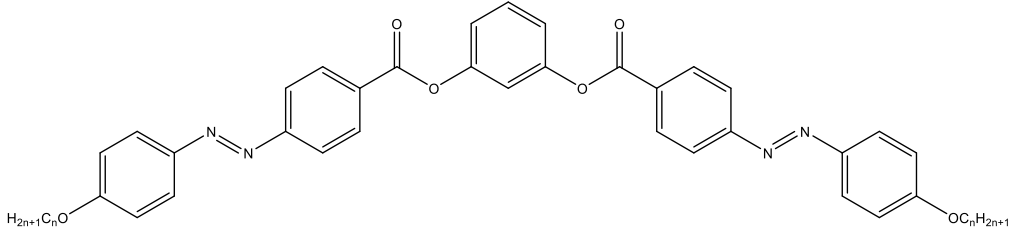   | S1_1              | 6  | [39]      |
|                                                                                      | S1_2              | 7  | [39]      |
|                                                                                      | S1_3              | 8  | [39]      |
|                                                                                      | S1_4              | 9  | [39]      |
|                                                                                      | S1_5              | 10 | [39]      |
|                                                                                      | S1_6              | 12 | [42]      |
|                                                                                      | S1_7              | 14 | [42]      |
|                                                                                      | S1_8              | 16 | [42]      |
|                                                                                      | S1_9              | 18 | [42]      |
|  | S2_1              | 8  | [40]      |
|                                                                                      | S2_2              | 10 |           |
|                                                                                      | S2_3              | 12 |           |
|                                                                                      | S2_4              | 14 |           |
|                                                                                      | S2_5              | 16 |           |
|                                                                                      | S2_6              | 18 |           |
|  | S3_1              | 8  | [19]      |
|                                                                                      | S3_2              | 10 |           |
|                                                                                      | S3_3              | 12 |           |
|                                                                                      | S3_4              | 14 |           |
|                                                                                      | S3_5              | 16 |           |
|  | S4_1              | 8  | [19]      |
|                                                                                      | S4_2              | 10 |           |
|                                                                                      | S4_3              | 12 |           |
|                                                                                      | S4_4              | 14 |           |
|                                                                                      | S4_5              | 16 |           |

|                                                                                                                                                                          |                                                                                                 |                                                              |                              |
|--------------------------------------------------------------------------------------------------------------------------------------------------------------------------|-------------------------------------------------------------------------------------------------|--------------------------------------------------------------|------------------------------|
| 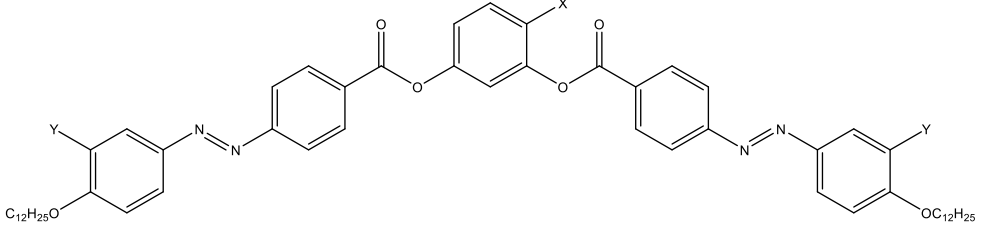 <p>X= Br, Y= H (S5_1); X= Br, Y= F (S5_2); X= Cl, Y= H (S5_3); X= Cl, Y= F (S5_4)</p> | S5_1<br>S5_2<br>S5_3<br>S5_4                                                                    | 12<br>12<br>12<br>12                                         | [43]<br>[44]<br>[43]<br>[44] |
|                                                                                        | S6_1<br>S6_2<br>S6_3<br>S6_4<br>S6_5<br>S6_6<br>S6_7<br>S6_8<br>S6_9                            | 4<br>6<br>8<br>10<br>12<br>14<br>16<br>18<br>20              | [2]                          |
|  <p>X= Br (S7_1); X= CH<sub>3</sub> (S7_2)</p>                                         | S7_1<br>S7_2                                                                                    | 18<br>18                                                     | [2]                          |
|                                                                                      | S8_1<br>S8_2<br>S8_3<br>S8_4<br>S8_5                                                            | 8<br>10<br>12<br>14<br>16                                    | [2]                          |
|                                                                                      | S9_1<br>S9_2<br>S9_3<br>S9_4<br>S9_5<br>S9_6<br>S9_7<br>S9_8<br>S9_9<br>S9_10<br>S9_11<br>S9_12 | 2<br>3<br>4<br>5<br>6<br>7<br>8<br>9<br>10<br>11<br>12<br>14 | [20]                         |

|                                                                                                                                                                                                                                         |                                                                                                                                                     |                                                                                          |      |
|-----------------------------------------------------------------------------------------------------------------------------------------------------------------------------------------------------------------------------------------|-----------------------------------------------------------------------------------------------------------------------------------------------------|------------------------------------------------------------------------------------------|------|
| 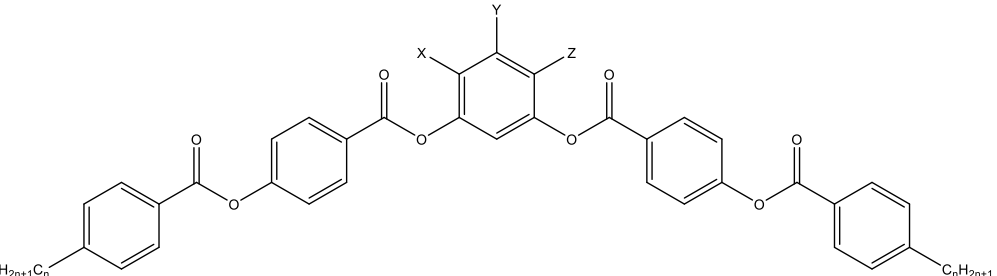 <p>X, Z= H and Y=CN (S10_1 and S10_2); X= Cl and Y, Z= H (S10_3);<br/>X, Z= Cl and Y= H(S10_4 and S10_5); X, Y= H and Z= CH<sub>3</sub> (S10_6).</p> | S10_1<br>S10_2<br>S10_3<br>S10_4<br>S10_5<br>S10_6                                                                                                  | 6<br>12<br>12<br>6<br>12<br>6                                                            | [20] |
|  <p>X= H (S11_1 ÷ S11_4);<br/>X= F (S11_5 ÷ S11_8);<br/>X= Cl (S11_9 ÷ S11_12);<br/>X= CH<sub>3</sub> (S11_13 ÷ S11_16)</p>                           | S11_1<br>S11_2<br>S11_3<br>S11_4<br>S11_5<br>S11_6<br>S11_7<br>S11_8<br>S11_9<br>S11_10<br>S11_11<br>S11_12<br>S11_13<br>S11_14<br>S11_15<br>S11_16 | 8<br>10<br>12<br>14<br>8<br>10<br>12<br>14<br>8<br>10<br>12<br>14<br>8<br>10<br>12<br>14 | [21] |
|                                                                                                                                                     | S12_1<br>S12_2<br>S12_3<br>S12_4<br>S12_5<br>S12_6<br>S12_7                                                                                         | 6<br>7<br>8<br>9<br>10<br>12<br>16                                                       | [33] |
|                                                                                                                                                     | S13_1                                                                                                                                               | 10                                                                                       | [41] |
|                                                                                                                                                     | S14_1<br>S14_2<br>S14_3<br>S14_4<br>S14_5<br>S14_6<br>S14_7<br>S14_8<br>S14_9                                                                       | 7<br>8<br>9<br>10<br>11<br>12<br>16<br>18<br>22                                          | [10] |

|                                                                                     |                                                                               |                                                 |      |
|-------------------------------------------------------------------------------------|-------------------------------------------------------------------------------|-------------------------------------------------|------|
| 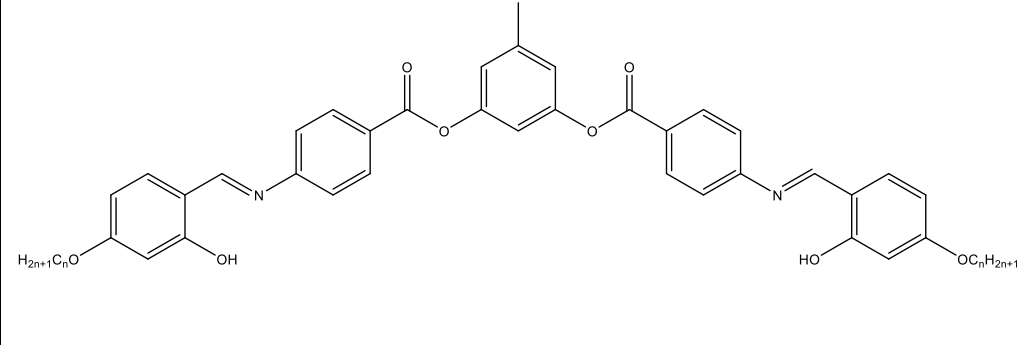   | S15_1<br>S15_2<br>S15_3<br>S15_4<br>S15_5<br>S15_6<br>S15_7<br>S15_8<br>S15_9 | 7<br>8<br>9<br>10<br>11<br>12<br>16<br>18<br>22 | [10] |
|    | S16_1<br>S16_2<br>S16_3<br>S16_4<br>S16_5<br>S16_6<br>S16_7<br>S16_8<br>S16_9 | 7<br>8<br>9<br>10<br>11<br>12<br>16<br>18<br>22 | [10] |
|   | S17_1<br>S17_2<br>S17_3<br>S17_4<br>S17_5<br>S17_6<br>S17_7<br>S17_8<br>S17_9 | 7<br>8<br>9<br>10<br>11<br>12<br>16<br>18<br>22 | [10] |
|  | S18_1<br>S18_2<br>S18_3<br>S18_4<br>S18_5<br>S18_6<br>S18_7                   | 8<br>9<br>10<br>11<br>12<br>16<br>18            | [10] |
|  | S19_1<br>S19_2<br>S19_3<br>S19_4<br>S19_5<br>S19_6<br>S19_7<br>S19_8          | 6<br>7<br>8<br>10<br>11<br>12<br>16<br>18       | [10] |

|  |                                                                                         |                                                       |      |
|--|-----------------------------------------------------------------------------------------|-------------------------------------------------------|------|
|  | S20_1<br>S20_2<br>S20_3<br>S20_4<br>S20_5                                               | 8<br>10<br>12<br>14<br>16                             | [2]  |
|  | S21_1<br>S21_2<br>S21_3<br>S21_4<br>S21_5                                               | 8<br>10<br>12<br>14<br>16                             | [43] |
|  | S22_1<br>S22_2<br>S22_3<br>S22_4                                                        | 8<br>10<br>14<br>16                                   | [43] |
|  | S23_1<br>S23_2<br>S23_3<br>S23_4<br>S23_5                                               | 8<br>10<br>12<br>14<br>16                             | [43] |
|  | S24_1<br>S24_2<br>S24_3<br>S24_4<br>S24_5<br>S24_6<br>S24_7<br>S24_8<br>S24_9<br>S24_10 | 6<br>8<br>9<br>10<br>12<br>14<br>16<br>18<br>20<br>22 | [32] |
|  | S25_1<br>S25_2<br>S25_3                                                                 | 6<br>14<br>20                                         | [32] |
|  | S26_1                                                                                   | 14                                                    | [32] |

|                                                                                    |       |    |      |
|------------------------------------------------------------------------------------|-------|----|------|
| 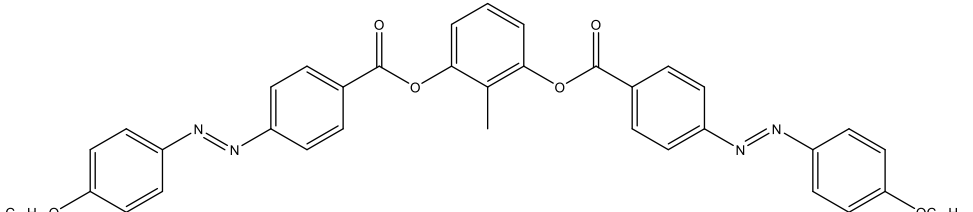 | S27_1 | 16 | [42] |
|------------------------------------------------------------------------------------|-------|----|------|

The accuracy indicators were calculated as follows:

*Mean Absolute Error (MAE):*  $MAE = \frac{1}{n} \sum_{i=1}^n |y_{actual} - y_{predicted}|$  (Equation S1)

*Mean Absolute Percentage Error (MAPE):*  $MAPE = \frac{100}{n} \sum_{i=1}^n \left| \frac{y_{actual} - y_{predicted}}{y_{actual}} \right|$  (Equation S2)

*Root Mean Squared Error (RMSE):*  $RMSE = \sqrt{\frac{1}{n} \sum_{i=1}^n (y_{actual} - y_{predicted})^2}$  (Equation S3)

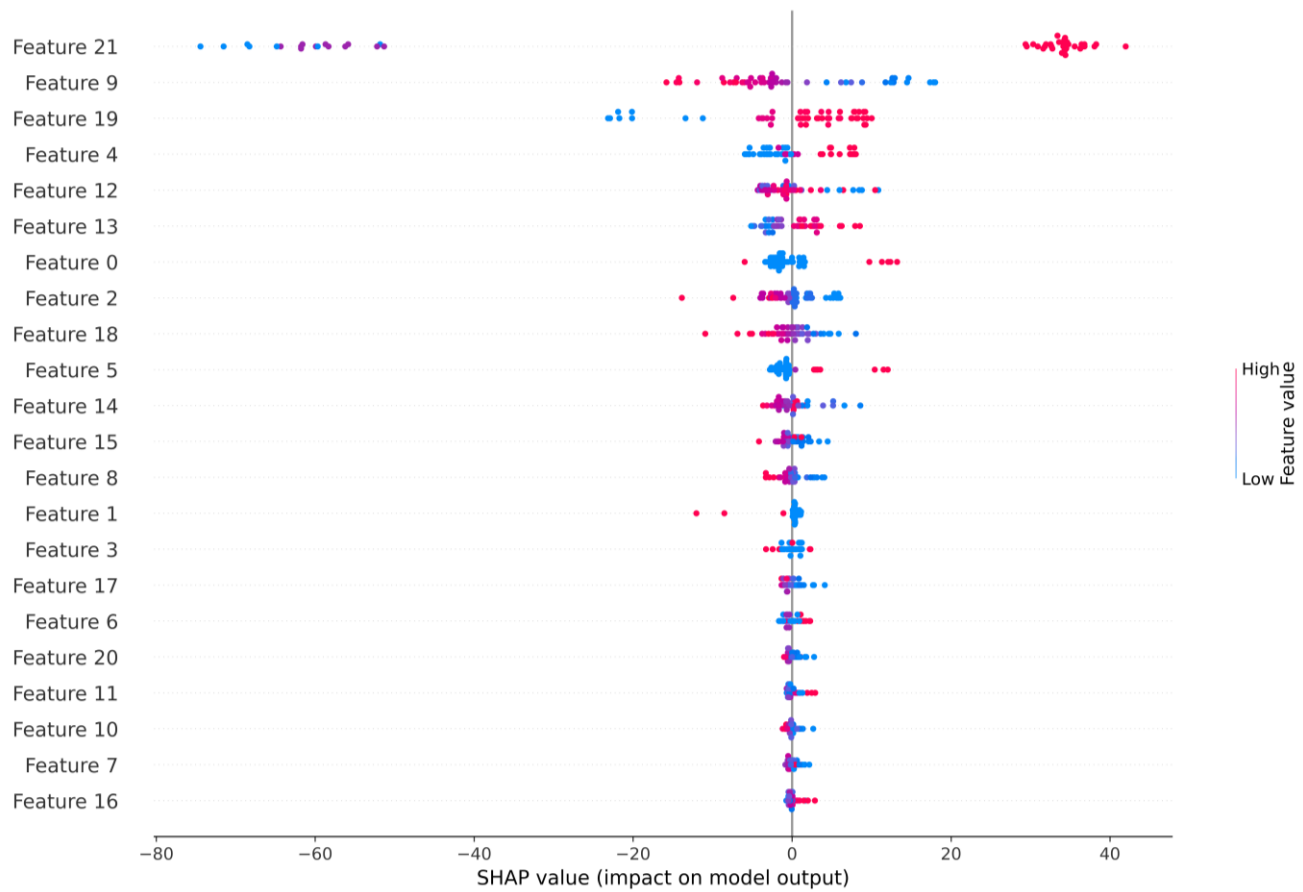

Figure S1- The SHAP values for T1 model.

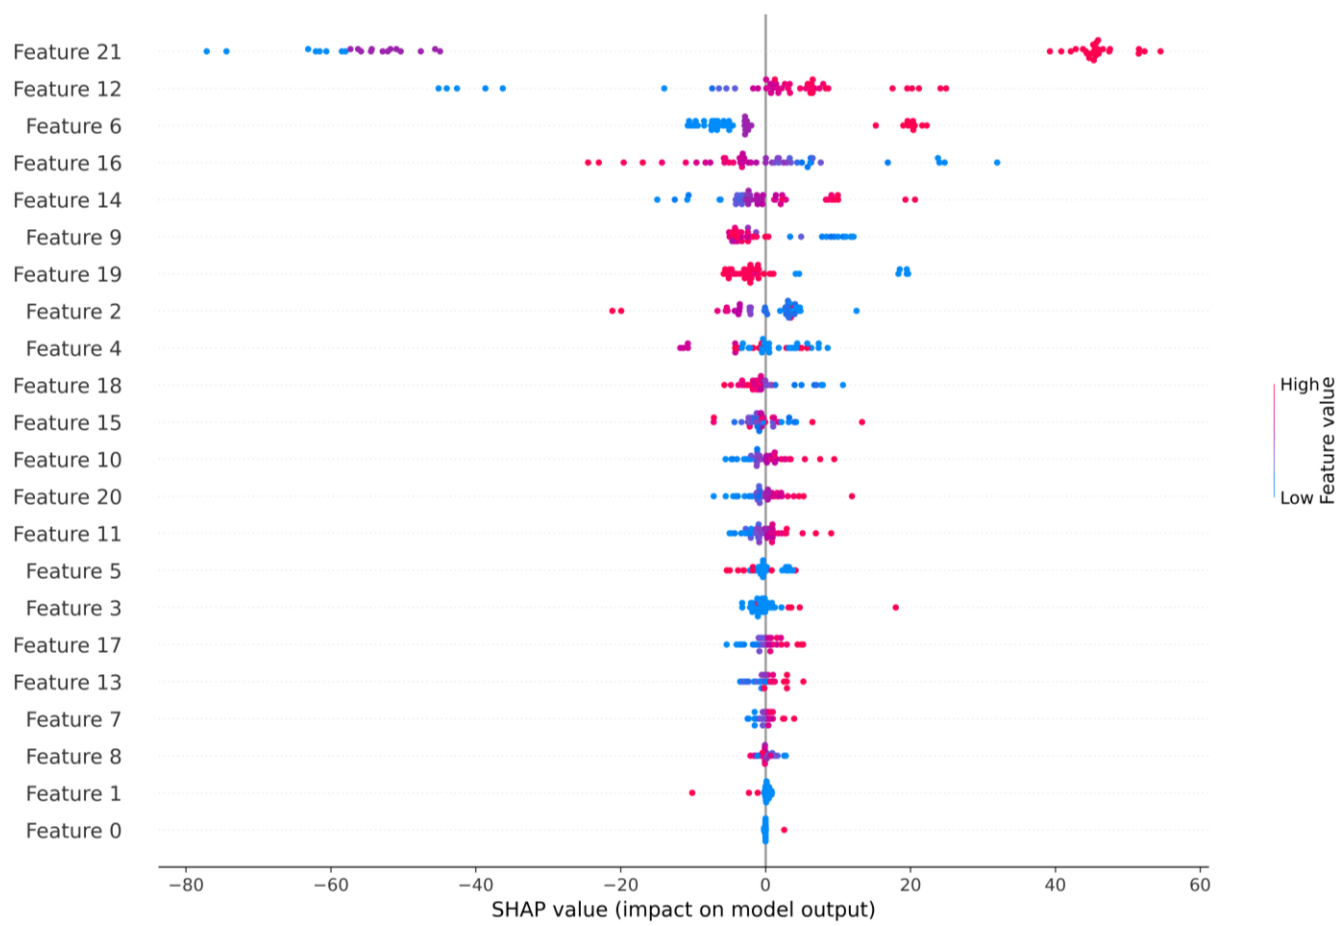

Figure S2- The SHAP values for T2 model.



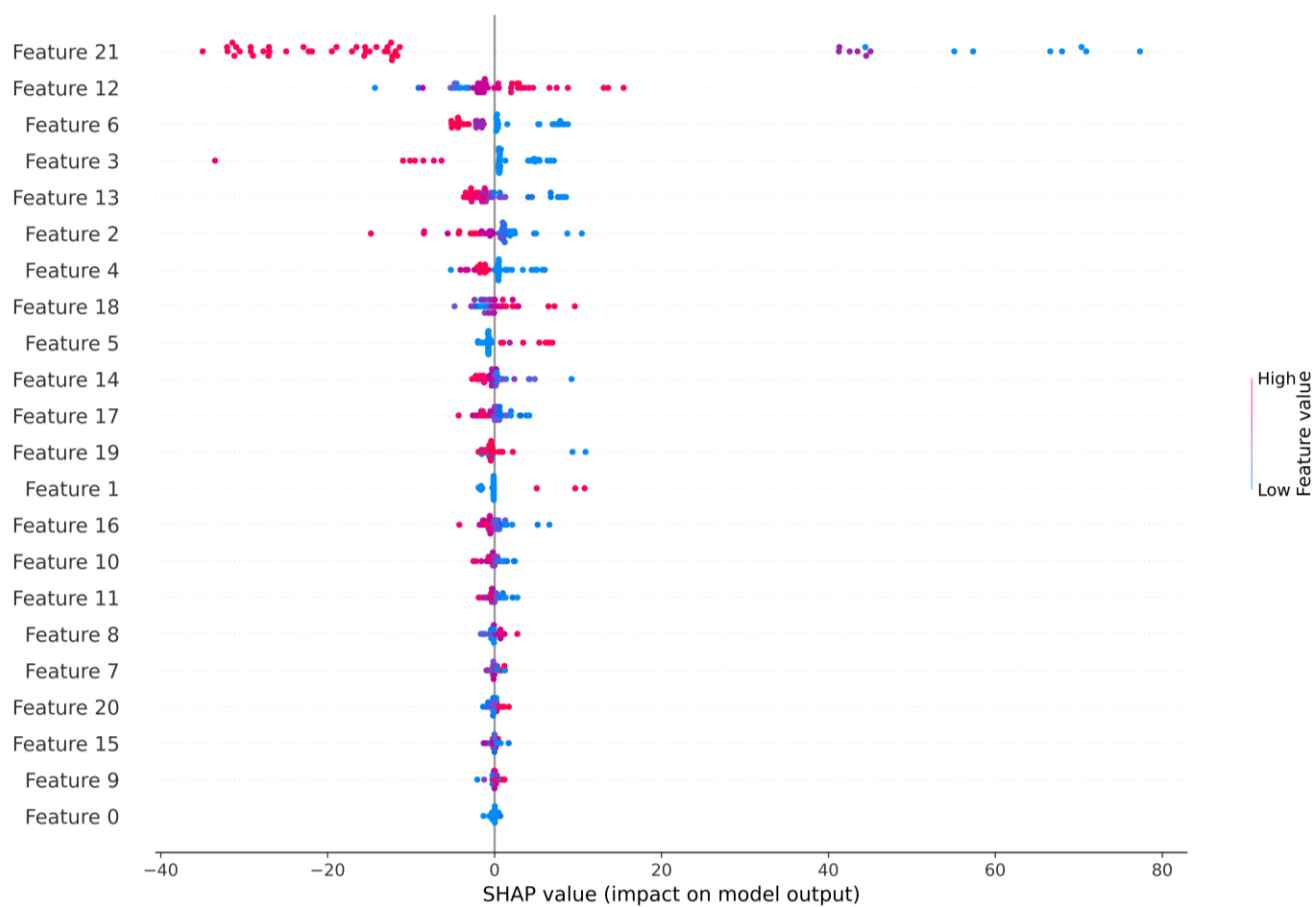

Figure S3- The SHAP values for T3 model.

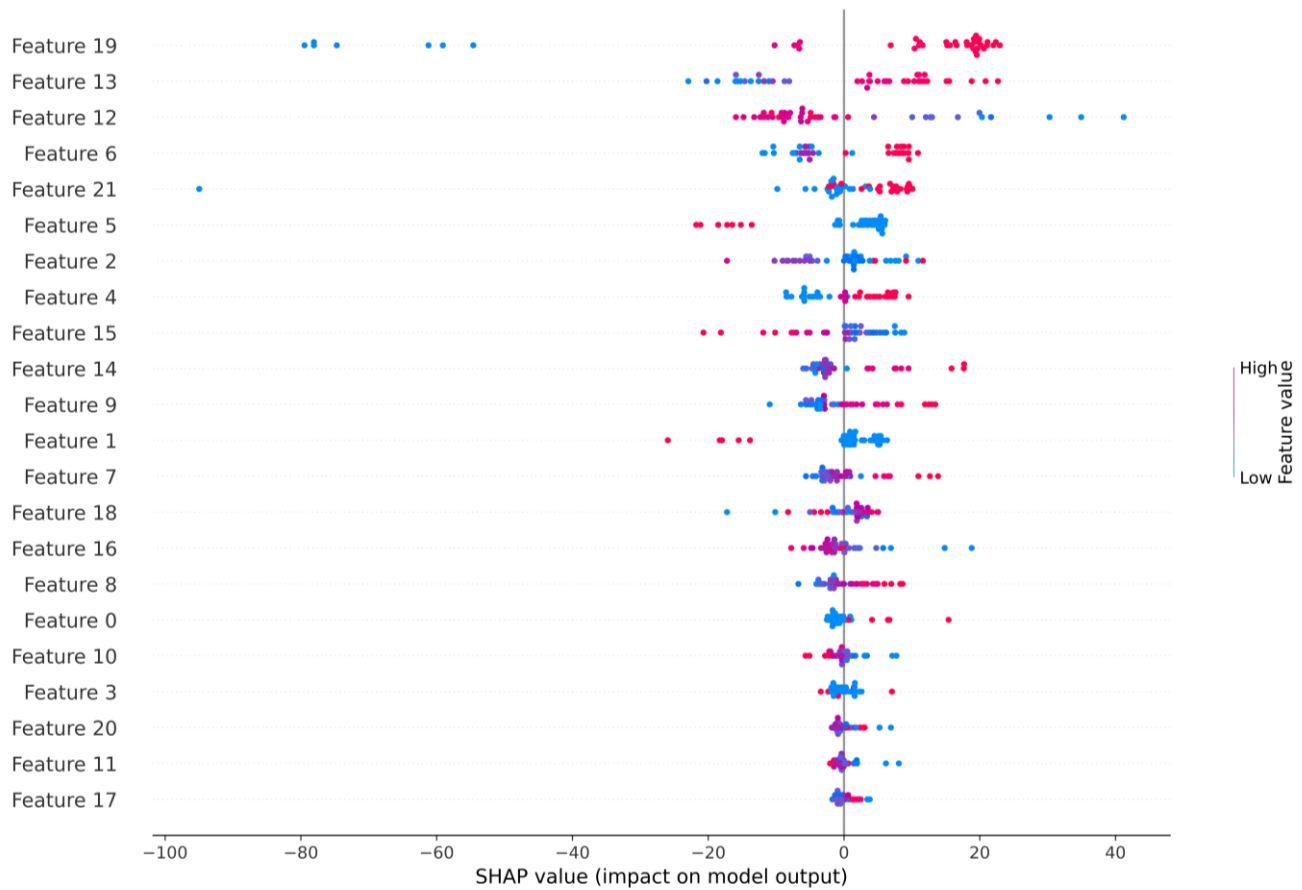

Figure S4- The SHAP values for T4 model.

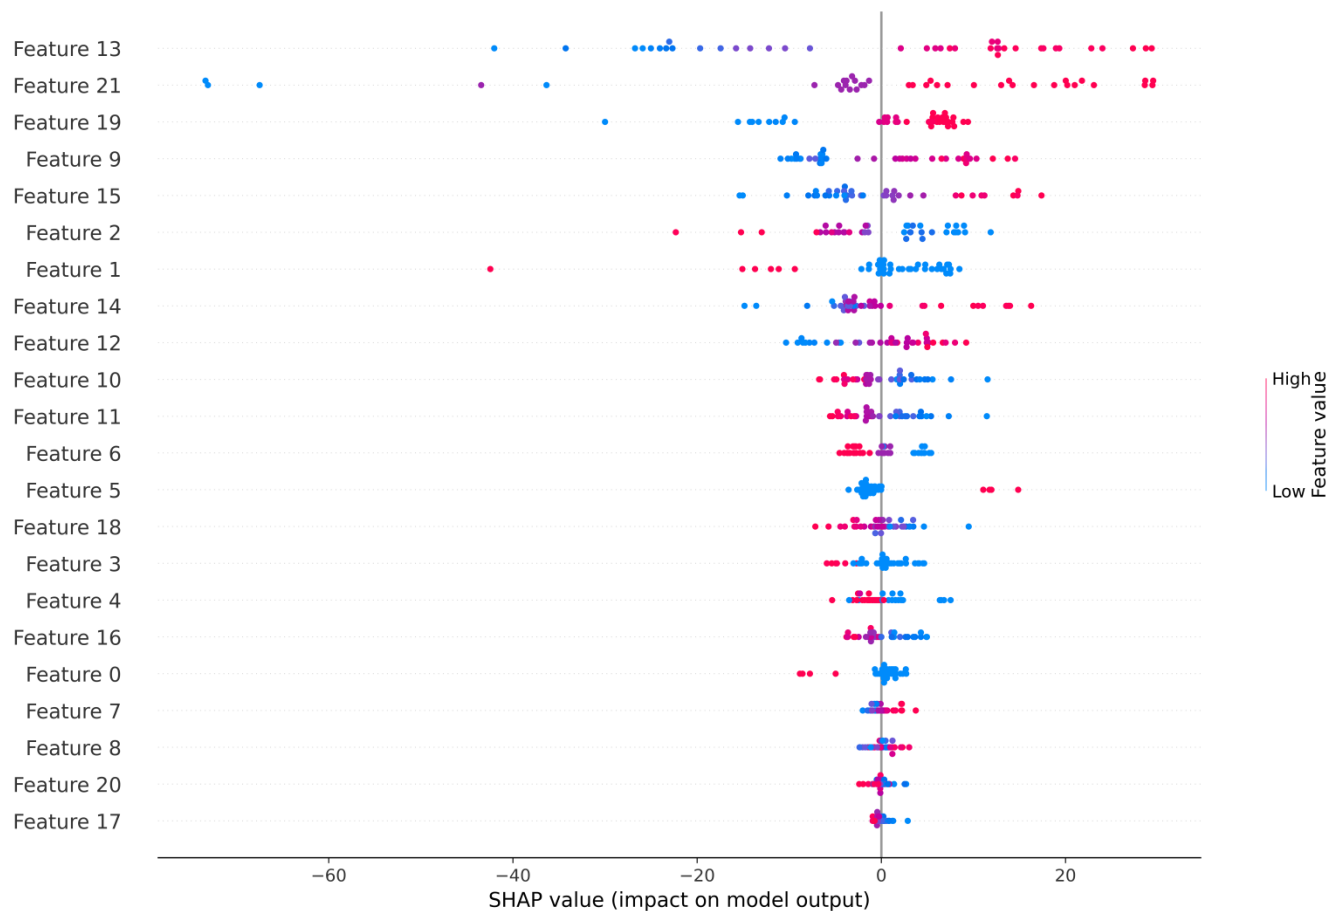

Figure S5- The SHAP values for T5 model.

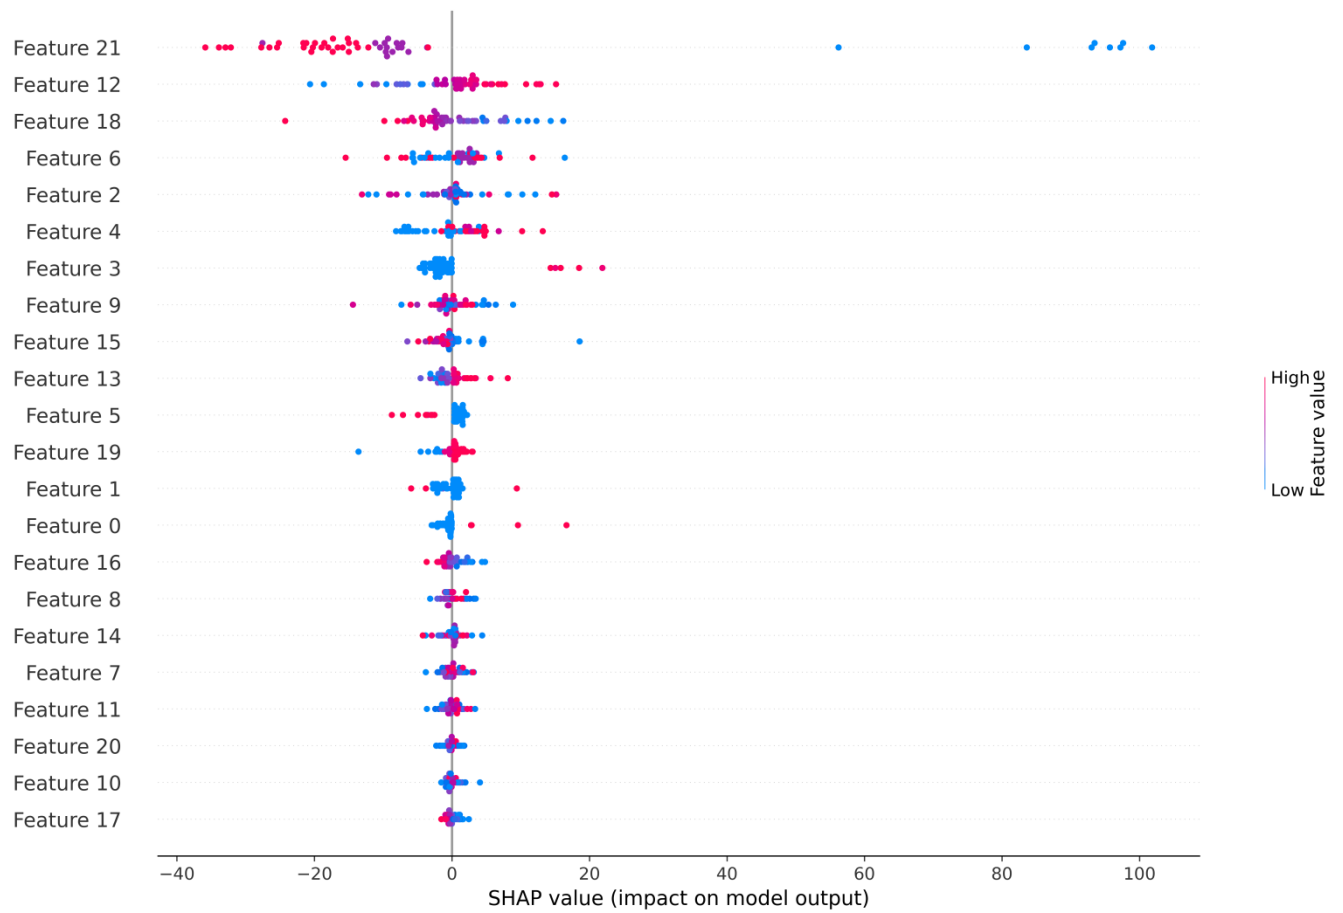

Figure S6- The SHAP values for T6 model.
